# Supplementary material
Source: PubMed Central journal article supplement (PMC6178594)
Supplement: MDC3-3-130-s001.pdf [file MDC3-3-130-s001.pdf]

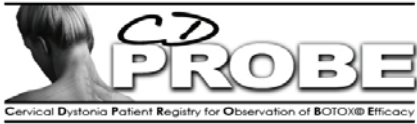

## Healthcare Utilization & Work Productivity

Patient Registration ID:

Site ID

Patient ID

Patient Initials (FML)

### Work Status and Work Productivity in Cervical Dystonia:

Have you ever been employed (including self-employed)?  Yes  No

**STOP:** If you have never been employed, please stop here

Are you currently employed (including being self-employed)?  Yes  No

#### If you are **NOT** currently employed answer the following:

1. Were you employed (including being self-employed) when symptoms of cervical dystonia began?  
 Yes  No
2. If you were employed when you were diagnosed with CD, did the CD cause you to stop working?  
 Yes  No

#### If you **ARE** currently employed answer the following:

1. Has your employment status been affected by cervical dystonia?  
 No  
 Same job, reduced hours or responsibility  
 Different job with less responsibility or pay  
 Loss of employment
2. Over the past month, have you missed work due to your cervical dystonia?  
 Yes  No  
If yes, number of days: \_\_\_\_\_
3. Does cervical dystonia decrease your productivity at work? That is, does your disease impact how effective you are or can be at work or how much work you can complete?  
 Yes  No

If yes, relatively speaking, how productive are you at work? \_\_\_\_\_ %  
(100% = normal, 0% = no work gets done)
